# Supplementary material
Source: Springer Nature journal article supplement (https://www.springermedizin.de/resource/supplementary/12889_2009_2087_MOESM2_ESM.pdf/9484552)
Supplement: MOESM2 [file 9484552]

**Table 3 - Mean scores on frailty instruments <sup>1</sup> according to sex, age, educational level and income.**

|                                      |                                      | GFI              | TFI              | SPQ              |
|--------------------------------------|--------------------------------------|------------------|------------------|------------------|
| Total sample                         | Mean (sd)                            | 3.6 (2.8)        | 4.2 (3.2)        | 1.9 (1.2)        |
| Sex                                  | Mean (sd)                            |                  |                  |                  |
| - Male                               |                                      | 3.2 (2.7)        | 3.4 (3.1)        | 2.1 (1.2)        |
| - Female                             |                                      | 3.9 (2.8)        | 4.7 (3.2)        | 1.7 (1.2)        |
|                                      | Z statistic<br>(P-value)             | -3.31<br>(0.001) | -4.95<br>(0.000) | -3.28<br>(0.001) |
| Age                                  | Mean (sd)                            |                  |                  |                  |
| - ≤ 74 yrs                           |                                      | 3.0 (2.7)        | 3.3 (3.1)        | 1.7 (1.2)        |
| - 75-79 yrs                          |                                      | 3.6 (2.8)        | 4.2 (3.3)        | 1.9 (1.2)        |
| - ≥ 80 yrs                           |                                      | 4.4 (2.7)        | 5.3 (3.1)        | 2.2 (1.2)        |
|                                      | Chi-square <sup>2</sup><br>(P-value) | 27.58<br>(0.000) | 37.2<br>(0.000)  | 15.84<br>(0.000) |
| Education                            | Mean (sd)                            |                  |                  |                  |
| - No Education/<br>Primary Education |                                      | 4.1 (3.0)        | 4.7 (3.5)        | 2.0 (1.3)        |
| - Secondary<br>Education             |                                      | 3.6 (2.7)        | 4.1 (3.1)        | 1.8 (1.2)        |
| - Higher Education                   |                                      | 2.7 (2.2)        | 3.1 (2.8)        | 1.7 (1.0)        |
|                                      | Chi-square <sup>2</sup><br>(P-value) | 12.13<br>(0.002) | 13.47<br>(0.001) | 2.47<br>(0.291)  |
| Income                               | Mean (sd)                            |                  |                  |                  |
| - ≤ €900                             |                                      | 4.6 (3.0)        | 5.3 (3.6)        | 2.2 (1.4)        |
| - €901 to €1500                      |                                      | 4.0 (2.9)        | 4.8 (3.4)        | 1.8 (1.3)        |
| - ≥ € 1501                           |                                      | 2.8 (2.3)        | 3.1 (2.6)        | 1.8 (1.0)        |
|                                      | Chi-square <sup>2</sup><br>(P-value) | 29.42<br>(0.000) | 37.16<br>(0.000) | 5.05<br>0.080    |

<sup>1</sup> Higher scores indicate poorer functioning.

<sup>2</sup> Kruskal Wallis test
